# Supplementary material for: Improving the Measurement of Semantic Similarity between Gene Ontology Terms and Gene Products: Insights from an Edge- and IC-Based Hybrid Method
Source: PubMed Central journal article supplement (PMC3669204; doi:10.1371/journal.pone.0066745), 2013-05-31
Supplement: pone.0066745.s002.pdf [file pone.0066745.s002.pdf]

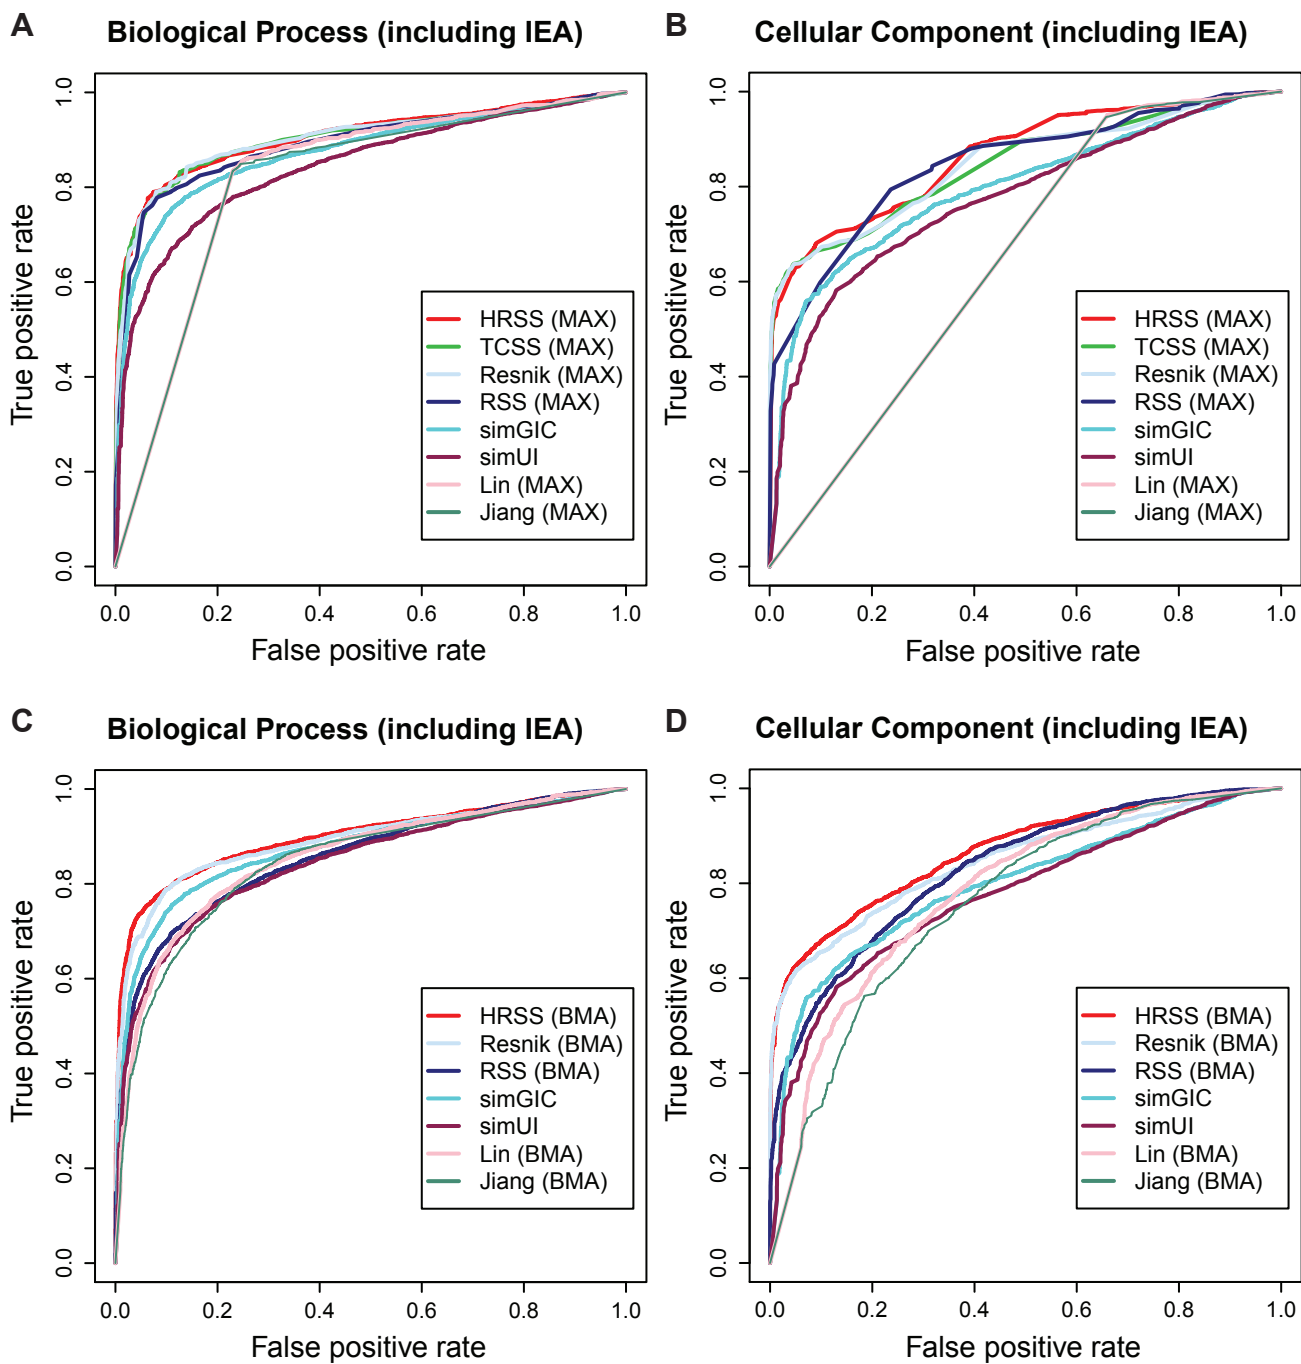

**Figure S2. ROC curves comparing different semantic similarity methods based on yeast protein-protein interaction datasets (including IEA).** The evaluation was done for the BP and CC ontologies. The (A and B) MAX and (C and D) BMA pairwise rules were applied.
