# Supplementary material for: Improving the Measurement of Semantic Similarity between Gene Ontology Terms and Gene Products: Insights from an Edge- and IC-Based Hybrid Method
Source: PubMed Central journal article supplement (PMC3669204; doi:10.1371/journal.pone.0066745), 2013-05-31
Supplement: pone.0066745.s003.pdf [file pone.0066745.s003.pdf]

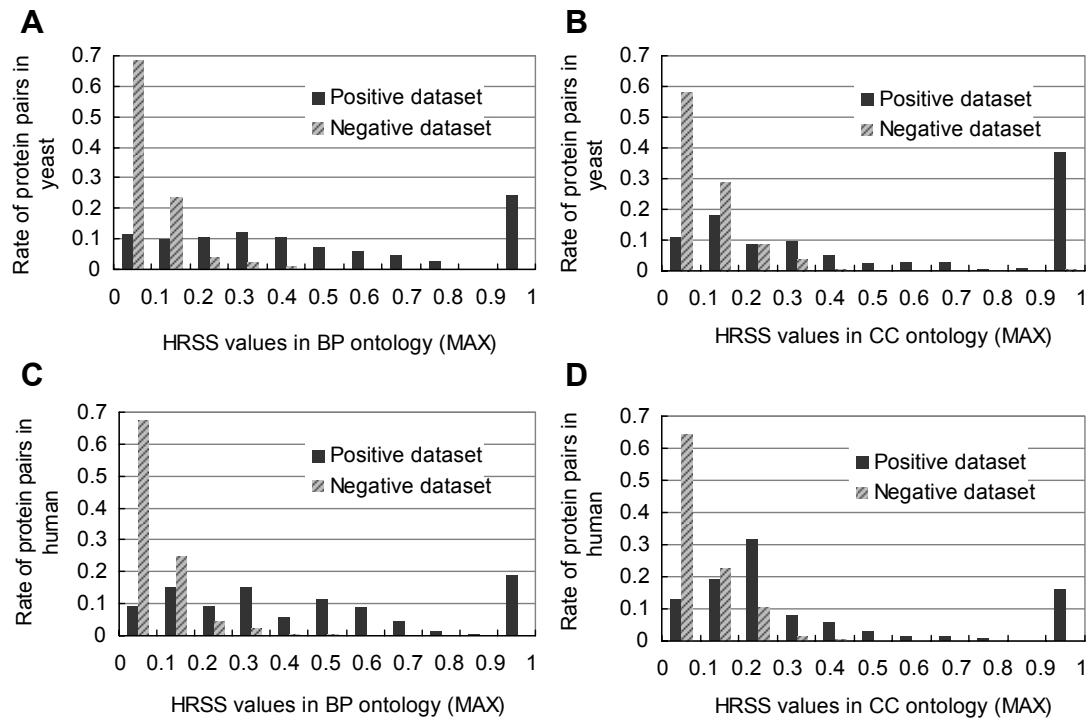

**Figure S3. Distributions of the positive and negative interacting protein pairs with various HRSS (MAX) values.** HRSS was calculated for (A and B) yeast and (C and D) human protein-protein interactions in the gold standard positive and negative datasets for BP and CC ontologies (including IEA annotations). The [0,1] interval of HRSS values is equally divided into 11 categories, which are  $\{[0.1 \times i, 0.1 \times (i+1)), i = 0, 1, \dots, 9\}$  plus HRSS = 1.
