# Supplementary material for: Improving the Measurement of Semantic Similarity between Gene Ontology Terms and Gene Products: Insights from an Edge- and IC-Based Hybrid Method
Source: PubMed Central journal article supplement (PMC3669204; doi:10.1371/journal.pone.0066745), 2013-05-31
Supplement: pone.0066745.s005.pdf [file pone.0066745.s005.pdf]

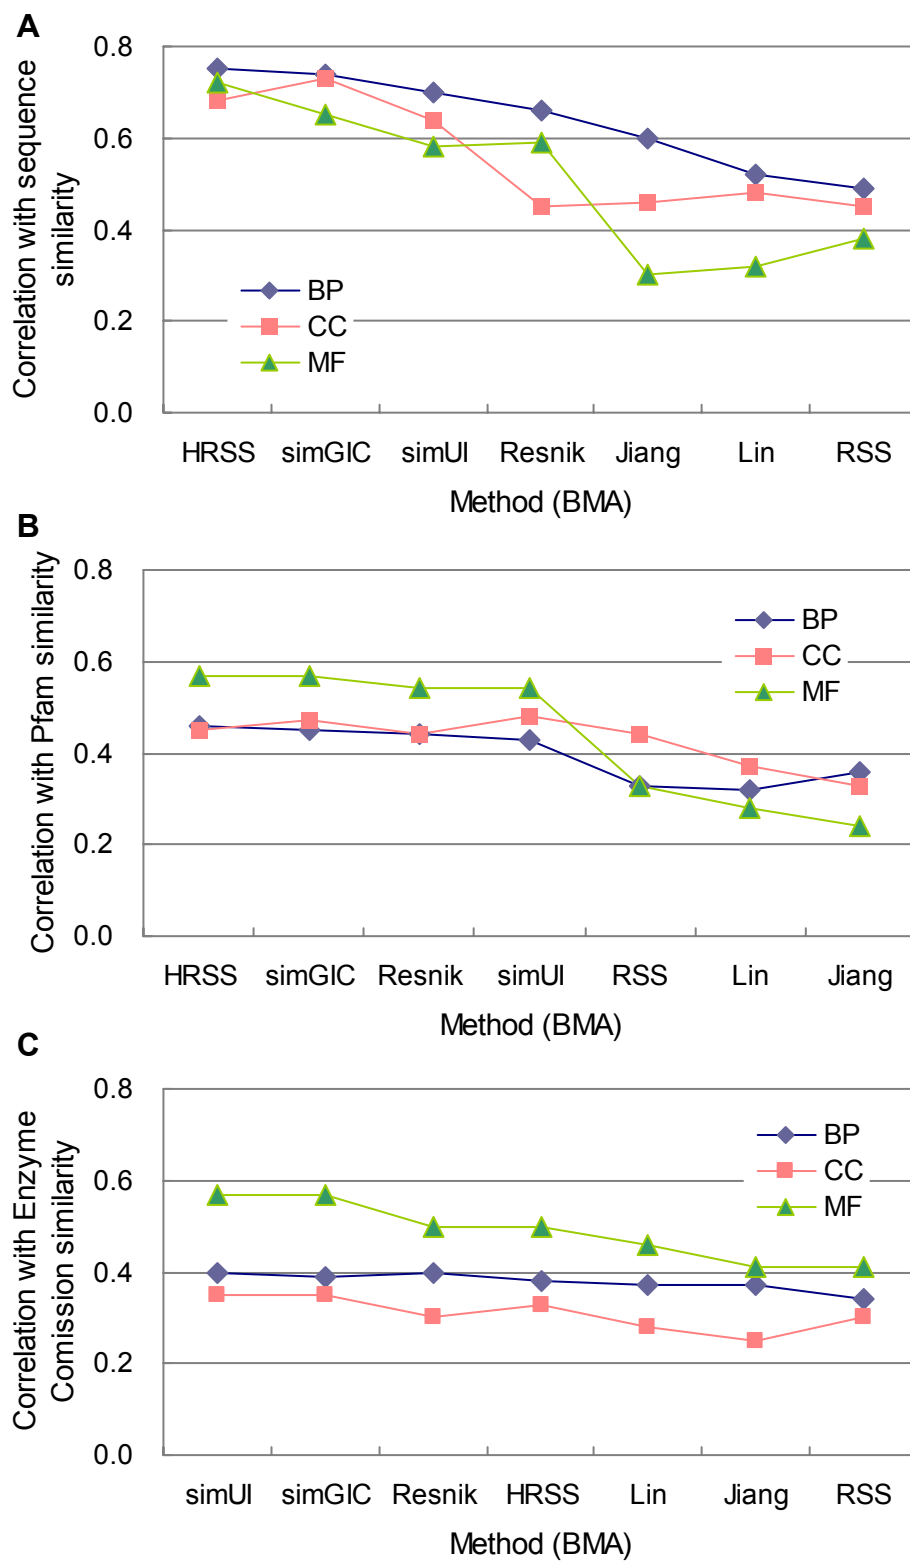

**Figure S5. Correlation between semantic similarity (BMA) and the CESSM dataset (excluding IEA).** CESSM displays the data of (A) sequence, (B) Pfam and (C) ECC similarities.
