# Supplementary material for: Improving the Measurement of Semantic Similarity between Gene Ontology Terms and Gene Products: Insights from an Edge- and IC-Based Hybrid Method
Source: PubMed Central journal article supplement (PMC3669204; doi:10.1371/journal.pone.0066745), 2013-05-31
Supplement: pone.0066745.s006.pdf [file pone.0066745.s006.pdf]

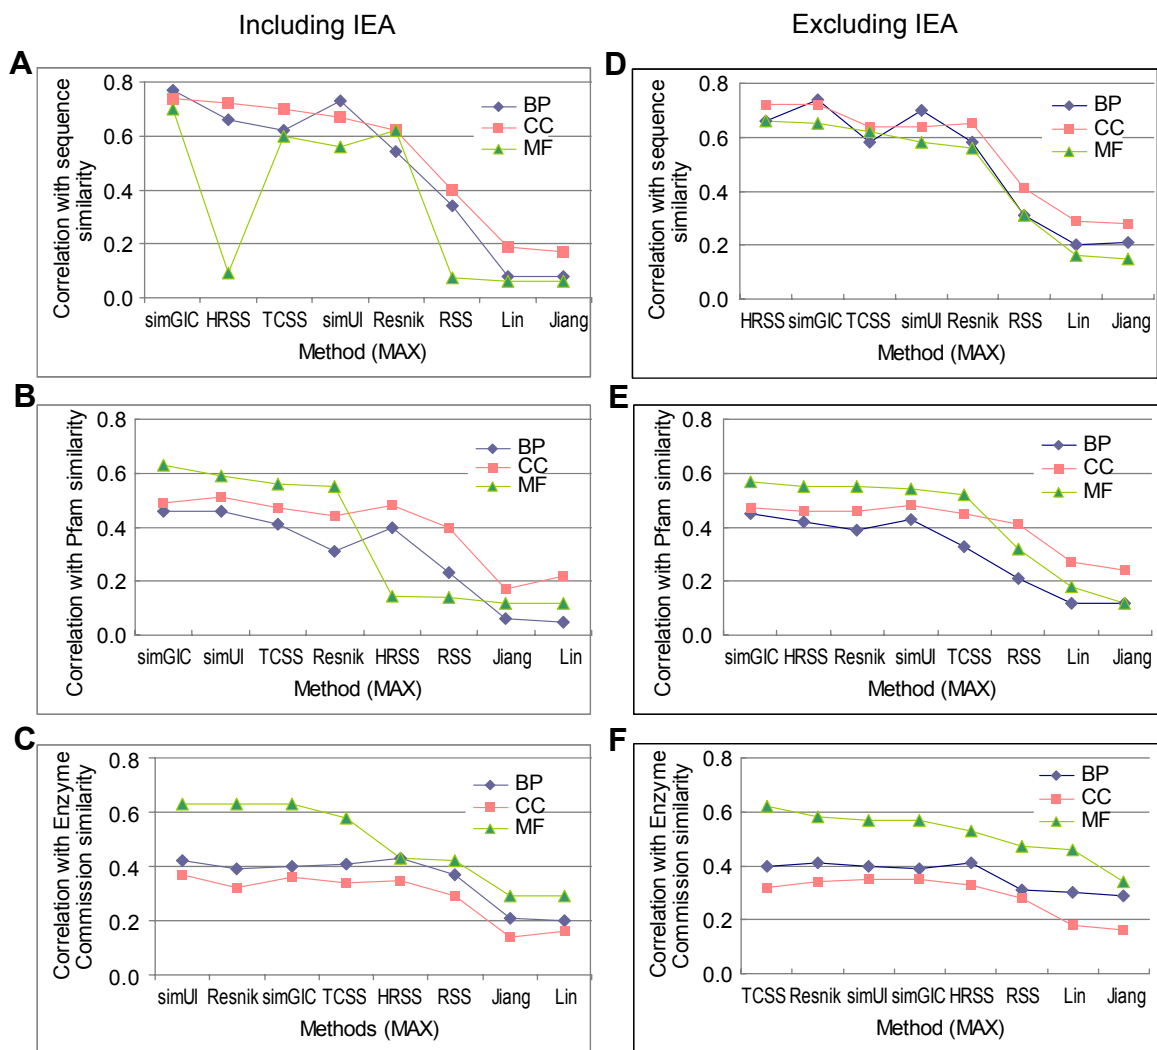

**Figure S6. Correlation between semantic similarity (MAX) and the CESSM dataset (including and excluding IEA).** CESSM holds the data of (A and D) sequence, (B and E) Pfam and (C and F) ECC similarities.
