# Supplementary material for: Improving the Measurement of Semantic Similarity between Gene Ontology Terms and Gene Products: Insights from an Edge- and IC-Based Hybrid Method
Source: PubMed Central journal article supplement (PMC3669204; doi:10.1371/journal.pone.0066745), 2013-05-31
Supplement: pone.0066745.s009.pdf [file pone.0066745.s009.pdf]

**Table S1.** The sizes of gold standard positive and negative interaction datasets used for ROC analysis in human and yeast

| GO | Human         |               | Yeast         |               |
|----|---------------|---------------|---------------|---------------|
|    | Including IEA | Including IEA | Including IEA | Excluding IEA |
| BP | 2150          | 2016          | 4095          | 4061          |
| CC | 2179          | 1945          | 4129          | 4113          |
| MF | 2094          | 1842          | 3488          | 3203          |

Number of interactions in the positive and negative datasets for BB, CC and MF ontologies are listed. The negative dataset has the equal number of protein pairs as that in the positive dataset, and was generated by randomly choosing annotated proteins from a specific corpus of GO annotations that are absent from a set of all known genome-wide protein-protein interactions. The generation of negative datasets was done separately for three ontologies.
