# Supplementary material for: Improving the Measurement of Semantic Similarity between Gene Ontology Terms and Gene Products: Insights from an Edge- and IC-Based Hybrid Method
Source: PubMed Central journal article supplement (PMC3669204; doi:10.1371/journal.pone.0066745), 2013-05-31
Supplement: pone.0066745.s010.pdf [file pone.0066745.s010.pdf]

**Table S2.** Area under the ROC curves (AUCs) for the yeast PPI dataset

|        |     | Including IEA |             |             | Excluding IEA |             |             |
|--------|-----|---------------|-------------|-------------|---------------|-------------|-------------|
|        |     | BP            | CC          | MF          | BP            | CC          | MF          |
| HRSS   | MAX | <b>0.91</b>   | <b>0.87</b> | <b>0.76</b> | <b>0.90</b>   | <b>0.86</b> | 0.72        |
|        | BMA | 0.90          | <b>0.87</b> | <b>0.76</b> | 0.89          | <b>0.86</b> | 0.72        |
| TCSS   | MAX | 0.90          | 0.85        | <b>0.76</b> | <b>0.90</b>   | 0.85        | 0.73        |
| Resnik | MAX | 0.90          | 0.85        | 0.75        | <b>0.90</b>   | 0.85        | <b>0.74</b> |
|        | BMA | 0.89          | 0.85        | 0.75        | 0.89          | 0.84        | 0.72        |
| RSS    | MAX | 0.89          | 0.85        | 0.75        | 0.89          | 0.84        | 0.72        |
|        | BMA | 0.86          | 0.83        | 0.73        | 0.85          | 0.80        | 0.70        |
| simGIC |     | 0.87          | 0.80        | <b>0.76</b> | 0.87          | 0.79        | 0.72        |
| simUI  |     | 0.84          | 0.77        | <b>0.76</b> | 0.84          | 0.76        | 0.72        |
| Lin    | MAX | 0.82          | 0.65        | 0.72        | 0.89          | 0.71        | 0.73        |
|        | BMA | 0.85          | 0.78        | 0.73        | 0.87          | 0.74        | 0.72        |
| Jiang  | MAX | 0.81          | 0.65        | 0.68        | 0.85          | 0.69        | 0.70        |
|        | BMA | 0.84          | 0.76        | 0.70        | 0.86          | 0.68        | 0.70        |

The tests were carried out separately for BP and CC ontologies. The MAX and BMA strategies were used for datasets including or excluding the IEA evidence code. For each group, the top scores are in bold.
