# Supplementary material for: Improving the Measurement of Semantic Similarity between Gene Ontology Terms and Gene Products: Insights from an Edge- and IC-Based Hybrid Method
Source: PubMed Central journal article supplement (PMC3669204; doi:10.1371/journal.pone.0066745), 2013-05-31
Supplement: pone.0066745.s012.pdf [file pone.0066745.s012.pdf]

**Table S4.** Indexes used for evaluating the performance of HRSS (MAX) on scoring protein-protein interactions in human

| GO | HRSS | Predicted Positive | Predicted Negative | TP   | FN   | FP  | TN   | FPR (1-Specificity) | TPR (Sensitivity) | PPV           | NPV           | Youden index  |
|----|------|--------------------|--------------------|------|------|-----|------|---------------------|-------------------|---------------|---------------|---------------|
| BP | 0.9  | 409                | 3891               | 409  | 1741 | 0   | 2150 | 0.0000              | 0.1902            | 1.0000        | 0.5526        | 0.1902        |
|    | 0.8  | 440                | 3860               | 439  | 1711 | 1   | 2149 | 0.0005              | 0.2042            | 0.9977        | 0.5567        | 0.2037        |
|    | 0.7  | 534                | 3766               | 533  | 1617 | 1   | 2149 | 0.0005              | 0.2479            | 0.9981        | 0.5706        | 0.2474        |
|    | 0.6  | 729                | 3571               | 726  | 1424 | 3   | 2147 | 0.0014              | 0.3377            | <b>0.9959</b> | 0.6012        | 0.3363        |
|    | 0.5  | 982                | 3318               | 970  | 1180 | 12  | 2138 | 0.0056              | 0.4512            | 0.9878        | 0.6444        | 0.4456        |
|    | 0.4  | 1112               | 3188               | 1090 | 1060 | 22  | 2128 | 0.0102              | 0.5070            | 0.9802        | 0.6675        | 0.4967        |
|    | 0.3  | 1499               | 2801               | 1421 | 729  | 78  | 2072 | 0.0363              | 0.6609            | 0.9480        | 0.7397        | 0.6247        |
|    | 0.2  | 1789               | 2511               | 1618 | 532  | 171 | 1979 | 0.0795              | 0.7526            | 0.9044        | 0.7881        | <b>0.6730</b> |
|    | 0.1  | 2685               | 1615               | 1950 | 200  | 735 | 1415 | 0.3419              | 0.9070            | 0.7263        | <b>0.8762</b> | 0.5651        |
| CC | 0.9  | 355                | 4003               | 350  | 1829 | 5   | 2174 | 0.0023              | 0.1606            | 0.9859        | 0.5431        | 0.1583        |
|    | 0.8  | 367                | 3991               | 362  | 1817 | 5   | 2174 | 0.0023              | 0.1661            | 0.9864        | 0.5447        | 0.1638        |
|    | 0.7  | 406                | 3952               | 400  | 1779 | 6   | 2173 | 0.0028              | 0.1836            | 0.9852        | 0.5498        | 0.1808        |
|    | 0.6  | 433                | 3925               | 427  | 1752 | 6   | 2173 | 0.0028              | 0.1960            | 0.9861        | 0.5536        | 0.1932        |
|    | 0.5  | 483                | 3875               | 476  | 1703 | 7   | 2172 | 0.0032              | 0.2184            | <b>0.9855</b> | 0.5605        | 0.2152        |
|    | 0.4  | 631                | 3727               | 613  | 1566 | 18  | 2161 | 0.0083              | 0.2813            | 0.9715        | 0.5798        | 0.2731        |
|    | 0.3  | 831                | 3527               | 785  | 1394 | 46  | 2133 | 0.0211              | 0.3603            | 0.9446        | 0.6048        | 0.3391        |
|    | 0.2  | 1747               | 2611               | 1478 | 701  | 269 | 1910 | 0.1235              | 0.6783            | 0.8460        | 0.7315        | <b>0.5548</b> |
|    | 0.1  | 2671               | 1687               | 1893 | 286  | 778 | 1401 | 0.3570              | 0.8687            | 0.7087        | <b>0.8305</b> | 0.5117        |

2150 and 2179 protein pairs are in the positive protein-protein interaction datasets BP and CC ontologies, respectively. The negative dataset contains the same number of protein pairs as that in positive dataset. The HRSS thresholds chosen for defining positive and negative interactions were highlighted in gray. PPV was used as one index for selecting positive interactions while NPV was mainly for selecting negative ones.
