# Supplementary material for: Improving the Measurement of Semantic Similarity between Gene Ontology Terms and Gene Products: Insights from an Edge- and IC-Based Hybrid Method
Source: PubMed Central journal article supplement (PMC3669204; doi:10.1371/journal.pone.0066745), 2013-05-31
Supplement: pone.0066745.s013.pdf [file pone.0066745.s013.pdf]

**Table S5.** Summary of the functional similarities of observed human-mouse orthologs calculated by various semantic similarity methods (including IEA)

| Strategy | GO | Num. of orthologs | Functional similarity | HRSS   | simGIC | simUI  | Resnik | TCSS   | Jiang  | Lin    | RSS    |
|----------|----|-------------------|-----------------------|--------|--------|--------|--------|--------|--------|--------|--------|
| BMA      | BP | 5726              | Mean                  | 0.45   | 0.76   | 0.79   | 2.95   |        | 0.89   | 0.92   | 0.79   |
|          |    |                   | Stdev. <sup>a</sup>   | 0.1721 | 0.2804 | 0.2516 | 0.8803 |        | 0.1736 | 0.1332 | 0.1107 |
|          |    |                   | SE <sup>b</sup>       | 0.0023 | 0.0037 | 0.0033 | 0.0116 |        | 0.0023 | 0.0018 | 0.0015 |
|          | CC | 5539              | Mean                  | 0.30   | 0.81   | 0.86   | 1.85   |        | 0.97   | 0.97   | 0.79   |
|          |    |                   | Stdev.                | 0.1535 | 0.2664 | 0.1982 | 0.7624 |        | 0.0870 | 0.0769 | 0.0954 |
|          |    |                   | SE                    | 0.0021 | 0.0036 | 0.0027 | 0.0102 |        | 0.0012 | 0.0010 | 0.0013 |
|          | MF | 4966              | Mean                  | 0.46   | 0.85   | 0.87   | 2.32   |        | 0.94   | 0.94   | 0.79   |
|          |    |                   | Stdev.                | 0.1908 | 0.2415 | 0.2009 | 0.8771 |        | 0.1351 | 0.1252 | 0.1256 |
|          |    |                   | SE                    | 0.0027 | 0.0034 | 0.0029 | 0.0124 |        | 0.0019 | 0.0018 | 0.0018 |
| MAX      | BP | 5726              | Mean                  | 0.81   | 0.76   | 0.79   | 4.63   | 0.68   | 0.99   | 1.00   | 0.94   |
|          |    |                   | Stdev.                | 0.2398 | 0.2804 | 0.2516 | 1.1050 | 0.1730 | 0.0795 | 0.0544 | 0.0803 |
|          |    |                   | SE                    | 0.0032 | 0.0037 | 0.0033 | 0.0146 | 0.0023 | 0.0011 | 0.0007 | 0.0011 |
|          | CC | 5539              | Mean                  | 0.62   | 0.81   | 0.86   | 3.29   | 0.68   | 1.00   | 1.00   | 0.91   |
|          |    |                   | Stdev.                | 0.3282 | 0.2664 | 0.1982 | 1.3522 | 0.3297 | 0.0430 | 0.0409 | 0.0866 |
|          |    |                   | SE                    | 0.0044 | 0.0036 | 0.0027 | 0.0182 | 0.0044 | 0.0006 | 0.0005 | 0.0012 |
|          | MF | 4966              | Mean                  | 0.85   | 0.85   | 0.87   | 3.96   | 0.58   | 0.99   | 0.99   | 0.94   |
|          |    |                   | Stdev.                | 0.2786 | 0.2415 | 0.2009 | 1.4119 | 0.2092 | 0.0900 | 0.0840 | 0.1274 |
|          |    |                   | SE                    | 0.0040 | 0.0034 | 0.0029 | 0.0200 | 0.0030 | 0.0013 | 0.0012 | 0.0018 |

<sup>a</sup> Standard deviation (stdev.) of the functional similarities of observed orthologs.

<sup>b</sup> Standard error (SE) calculated as stdev./sqrt(N) where N is the number of orthologs.
