# Supplementary material for: Improving the Measurement of Semantic Similarity between Gene Ontology Terms and Gene Products: Insights from an Edge- and IC-Based Hybrid Method
Source: PubMed Central journal article supplement (PMC3669204; doi:10.1371/journal.pone.0066745), 2013-05-31
Supplement: pone.0066745.s014.pdf [file pone.0066745.s014.pdf]

**Table S6.** Z-score analysis of various semantic similarity methods (BMA) for estimating the functional similarity among human-mouse orthologs

| IEA       | GO                   | ASV <sup>a</sup>                  | HRSS           | simGIC  | simUI  | Resnik | Jiang  | Lin    | RSS    |
|-----------|----------------------|-----------------------------------|----------------|---------|--------|--------|--------|--------|--------|
| Including | BP                   | Observed <sup>b</sup>             | 0.45           | 0.76    | 0.79   | 2.95   | 0.89   | 0.92   | 0.79   |
|           |                      | Mean.<br>randomized <sup>c</sup>  | 0.04           | 0.05    | 0.10   | 0.86   | 0.19   | 0.36   | 0.41   |
|           |                      | Stdev.<br>Randomized <sup>d</sup> | 0.0003         | 0.0007  | 0.0010 | 0.0055 | 0.0020 | 0.0023 | 0.0014 |
|           |                      | Z-score <sup>e</sup>              | <b>1341.01</b> | 1100.88 | 727.86 | 381.64 | 349.16 | 246.14 | 273.49 |
|           |                      | CC                                | Observed       | 0.30    | 0.81   | 0.86   | 1.85   | 0.97   | 0.97   |
|           | Mean.<br>Randomized  | 0.05                              | 0.13           | 0.28    | 0.63   | 0.55   | 0.58   | 0.54   |        |
|           | Stdev.<br>Randomized | 0.0005                            | 0.0015         | 0.0017  | 0.0038 | 0.0026 | 0.0027 | 0.0014 |        |
|           | Z-score              | <b>528.09</b>                     | 465.02         | 348.29  | 322.54 | 159.10 | 147.01 | 169.36 |        |
|           | MF                   | Observed                          | 0.46           | 0.85    | 0.87   | 2.32   | 0.94   | 0.94   | 0.79   |
|           |                      | Mean.<br>Randomized               | 0.06           | 0.05    | 0.11   | 0.47   | 0.28   | 0.33   | 0.34   |
|           |                      | Stdev.<br>Randomized              | 0.0006         | 0.0013  | 0.0014 | 0.0042 | 0.0029 | 0.0029 | 0.0020 |
|           |                      | Z-score                           | <b>643.27</b>  | 615.01  | 566.87 | 436.91 | 227.51 | 210.96 | 230.78 |
| Excluding |                      | BP                                | Observed       | 0.31    | 0.48   | 0.52   | 1.77   | 0.58   | 0.71   |
|           | Mean.<br>Randomized  |                                   | 0.04           | 0.04    | 0.08   | 0.55   | 0.06   | 0.27   | 0.36   |
|           | Stdev.<br>Randomized |                                   | 0.0003         | 0.0008  | 0.0010 | 0.0035 | 0.0015 | 0.0018 | 0.0014 |
|           | Z-score              |                                   | <b>861.73</b>  | 547.18  | 451.77 | 347.74 | 349.43 | 246.00 | 206.08 |
|           | CC                   |                                   | Observed       | 0.25    | 0.58   | 0.67   | 1.29   | 0.75   | 0.83   |
|           | Mean.<br>Randomized  | 0.04                              | 0.13           | 0.27    | 0.47   | 0.31   | 0.45   | 0.53   |        |
|           | Stdev.<br>Randomized | 0.0005                            | 0.0017         | 0.0019  | 0.0030 | 0.0030 | 0.0026 | 0.0014 |        |
|           | Z-score              | <b>423.44</b>                     | 269.83         | 210.94  | 272.64 | 149.10 | 145.80 | 142.33 |        |
|           | MF                   | Observed                          | 0.40           | 0.60    | 0.64   | 1.72   | 0.79   | 0.82   | 0.68   |
|           |                      | Mean.<br>Randomized               | 0.05           | 0.05    | 0.11   | 0.35   | 0.31   | 0.36   | 0.29   |
|           |                      | Stdev.<br>Randomized              | 0.0006         | 0.0015  | 0.0017 | 0.0039 | 0.0026 | 0.0027 | 0.0023 |
|           |                      | Z-score                           | <b>592.07</b>  | 357.11  | 307.03 | 355.88 | 188.14 | 167.54 | 169.02 |

<sup>a</sup> To measure the functional similarity of a list of orthologous protein pairs in general, an average value was calculated from the similarity values (ASV) of the orthologs.

<sup>b</sup> ASV value calculated from the observed set of human-mouse orthologs, i.e.,  $ASV_{observed}$ .

<sup>c</sup> Mean ASVs calculated from 1000 randomized sets of orthologs, i.e.,  $mean(ASV_{random})$ .

<sup>d</sup> Standard deviation (stdev.) of ASVs from 1000 randomized sets of orthologs, i.e.,

$stdev(ASV_{random})$ .

<sup>e</sup> Z-score was calculated as  $(ASV_{observed} - mean(ASV_{random})) / stdev(ASV_{random})$ . The maximum Z-score for each ontology is in bold.
