# Supplementary material for: Improving the Measurement of Semantic Similarity between Gene Ontology Terms and Gene Products: Insights from an Edge- and IC-Based Hybrid Method
Source: PubMed Central journal article supplement (PMC3669204; doi:10.1371/journal.pone.0066745), 2013-05-31
Supplement: pone.0066745.s015.pdf [file pone.0066745.s015.pdf]

**Table S7.** Z-score analysis of various semantic similarity methods (MAX) for estimating the functional similarity among human-mouse orthologs

| IEA       | GO | ASV <sup>a</sup>                  | HRSS          | simGIC         | simUI  | Resnik | TCSS   | Jiang  | Lin    | RSS    |
|-----------|----|-----------------------------------|---------------|----------------|--------|--------|--------|--------|--------|--------|
| Including | BP | Observed <sup>b</sup>             | 0.81          | 0.76           | 0.79   | 4.63   | 0.68   | 0.99   | 1.00   | 0.94   |
|           |    | Mean.<br>randomized <sup>c</sup>  | 0.12          | 0.05           | 0.10   | 1.83   | 0.27   | 0.57   | 0.73   | 0.65   |
|           |    | Stdev.<br>Randomized <sup>d</sup> | 0.0013        | 0.0007         | 0.0010 | 0.0097 | 0.0014 | 0.0043 | 0.0031 | 0.0016 |
|           |    | Z-score <sup>e</sup>              | 525.72        | <b>1100.88</b> | 727.86 | 287.21 | 282.39 | 98.86  | 86.10  | 173.64 |
|           | CC | Observed                          | 0.62          | 0.81           | 0.86   | 3.29   | 0.68   | 1.00   | 1.00   | 0.91   |
|           |    | Mean.<br>Randomized               | 0.12          | 0.13           | 0.28   | 1.14   | 0.16   | 0.85   | 0.85   | 0.73   |
|           |    | Stdev.<br>Randomized              | 0.0013        | 0.0015         | 0.0017 | 0.0081 | 0.0015 | 0.0028 | 0.0028 | 0.0015 |
|           |    | Z-score                           | 391.83        | <b>465.02</b>  | 348.29 | 264.78 | 348.22 | 53.98  | 54.82  | 116.78 |
|           | MF | Observed                          | 0.85          | 0.85           | 0.87   | 3.96   | 0.58   | 0.99   | 0.99   | 0.94   |
|           |    | Mean.<br>Randomized               | 0.17          | 0.05           | 0.11   | 1.00   | 0.15   | 0.62   | 0.66   | 0.61   |
|           |    | Stdev.<br>Randomized              | 0.0023        | 0.0013         | 0.0014 | 0.0080 | 0.0012 | 0.0045 | 0.0039 | 0.0024 |
|           |    | Z-score                           | 297.92        | <b>615.01</b>  | 566.87 | 369.60 | 360.44 | 82.06  | 86.08  | 136.83 |
| Excluding | BP | Observed                          | 0.57          | 0.48           | 0.52   | 2.71   | 0.53   | 0.86   | 0.91   | 0.84   |
|           |    | Mean.<br>Randomized               | 0.08          | 0.04           | 0.08   | 0.96   | 0.19   | 0.23   | 0.50   | 0.54   |
|           |    | Stdev.<br>Randomized              | 0.0009        | 0.0008         | 0.0010 | 0.0059 | 0.0012 | 0.0041 | 0.0029 | 0.0018 |
|           |    | Z-score                           | 532.61        | <b>547.18</b>  | 451.77 | 295.99 | 292.45 | 152.50 | 139.96 | 163.13 |
|           | CC | Observed                          | 0.42          | 0.58           | 0.67   | 1.85   | 0.48   | 0.91   | 0.94   | 0.83   |
|           |    | Mean.<br>Randomized               | 0.08          | 0.13           | 0.27   | 0.64   | 0.12   | 0.51   | 0.63   | 0.63   |
|           |    | Stdev.<br>Randomized              | 0.0009        | 0.0017         | 0.0019 | 0.0046 | 0.0011 | 0.0043 | 0.0033 | 0.0017 |
|           |    | Z-score                           | <b>376.18</b> | 269.83         | 210.94 | 266.61 | 337.60 | 93.33  | 94.95  | 120.32 |
|           | MF | Observed                          | 0.60          | 0.60           | 0.64   | 2.40   | 0.48   | 0.93   | 0.94   | 0.83   |
|           |    | Mean.<br>Randomized               | 0.08          | 0.05           | 0.11   | 0.52   | 0.11   | 0.49   | 0.54   | 0.44   |
|           |    | Stdev.<br>Randomized              | 0.0013        | 0.0015         | 0.0017 | 0.0059 | 0.0012 | 0.0035 | 0.0034 | 0.0029 |
|           |    | Z-score                           | <b>411.69</b> | 357.11         | 307.03 | 318.32 | 309.14 | 126.14 | 118.17 | 131.37 |

The detail description is the same as that in **Table S6**.
