# Supplementary material for: Improving the Measurement of Semantic Similarity between Gene Ontology Terms and Gene Products: Insights from an Edge- and IC-Based Hybrid Method
Source: PubMed Central journal article supplement (PMC3669204; doi:10.1371/journal.pone.0066745), 2013-05-31
Supplement: pone.0066745.s016.pdf [file pone.0066745.s016.pdf]

1 **Improving the Measurement of Semantic Similarity between Gene**  
2 **Ontology Terms and Gene Products: Insights from an Edge- and**  
3 **IC-based Hybrid Method**

4

5 **Xiaomei Wu, Erli Pang, Kui Lin, Zhen-Ming Pei**

6

7

8 **Supplementary Text S1**

9

10

11 **Contents**

12 **Section S1. Definition of Relative Specificity Similarity (RSS) method .....2**  
13 **Section S2. Definition of the semantic similarity methods used in the study .....2**  
14 **Section S3. Poor correlations of semantic similarities with gene co-expression .....5**  
15 **References .....6**

## Section S1. Definition of Relative Specificity Similarity (RSS) method

In 2006, we designed a metric for evaluating the relative specificity semantic similarity between two GO terms, and named it as RSS. We scored the functional similarity of two proteins by considering the maximum RSS values of all term pairs [1]. For a given GO, let  $term_i$  and  $term_j$  be two terms, and  $Paths(term_i)$  and  $Paths(term_j)$  be the paths in the graphs induced from  $term_i$  and  $term_j$ , respectively, to the root term of the GO. We defined  $dist(term_i, term_j)$  as the number of edges along the shortest path between  $term_i$  and  $term_j$ , such that the value equals zero if the two terms are the same. The RSS of the two GO terms,  $term_i$  and  $term_j$  consists of three different components (Figure 1A), denoted  $\alpha$ ,  $\beta$  and  $\gamma$ . Component  $\alpha$  is defined in Formula 1 and is equivalent to the definition of  $S$  in Wu's work [2]. It measures how specific the most recent common ancestor (MRCA) of the two terms is according to the structure of the GO.

$$\alpha = \max_{\substack{path_m \in Paths(term_i), \\ path_n \in Paths(term_j)}} \left\{ \begin{array}{l} \text{the number of common terms} \\ \text{between } path_m \text{ and } path_n \end{array} \right\} - 1 \quad (1)$$

Obviously, the larger component  $\alpha$  is, the more specific the MRCA.

Component  $\beta$  measures how general  $term_i$  and  $term_j$  are in the GO and is defined in Formula 2. The generality of a term is defined as the minimum distance between the term and the leaf terms descending from it. Leaf terms in a GO are those terms without any descendant. Obviously, the larger the distance between a term and its leaves, the more general is the term.

$$\beta = \max\{\min_{u \in U}\{dist(term_i, u)\}, \min_{v \in V}\{dist(term_j, v)\}\} \quad (2)$$

where  $U$  and  $V$  indicate all leaf nodes descending from  $term_i$  and  $term_j$ , respectively.

Component  $\gamma$  measures the local distance between two terms and the MRCA and is defined as

$$\gamma = dist(MRCA, term_i) + dist(MRCA, term_j). \quad (3)$$

If  $\gamma$  is smaller, it implies  $term_i$  and  $term_j$  share more similarity locally relative to the MRCA.

Then, the RSS between two terms of a given GO,  $term_i$  and  $term_j$  can be quantified by combining  $\alpha$ ,  $\beta$  and  $\gamma$  together in Formula 4,

$$RSS(term_i, term_j) = \frac{maxDepth^{GO}}{maxDepth^{GO} + \gamma} \cdot \frac{\alpha}{\alpha + \beta} \quad (4)$$

where  $maxDepth^{GO}$  is the maximum distance from the root term of the GO to the leaf terms. From the definition, the values of RSS are between 0 and 1. Clearly,  $RSS = 0$  ( $\alpha = 0$ ) indicates that the MRCA of  $term_i$  and  $term_j$  is the root of the GO, which means that the two terms share no commonality in describing protein properties; on the other hand,  $RSS = 1$  ( $\gamma = 0$  and  $\beta = 0$ ) indicates that  $term_i$  and  $term_j$  are the same leaf term, which means that the two terms are most specific in describing protein attributes. RSS calculates semantic similarity not only takes the specificity of a common ancestor ( $\alpha$ ) into account, but also considers the position in the global GO DAG where any two terms are ( $\beta$ ), as well as the local similarity between the term pair and their MRCA.

## Section S2. Definition of the semantic similarity methods used in the study

Six semantic similarity methods were compared with RSS and HRSS in the evaluation analyses. RSS, HRSS, Resnik [3], Jiang [4], Lin [5] and TCSS [6] are node-based methods that use pairwise approaches, while simUI [7] and simGIC [8] are groupwise measures. RSS and HRSS methods were implemented using C programming language. Resnik, Jiang, Lin, simUI and simGIC were

1 also implemented in our study as described in their respective publications. TCSS was computed  
 2 using the program provided by the publication [6]. Both maximum (MAX) and best-match  
 3 average (BMA) strategies were used to compare the functional similarity of pairwise term pairs  
 4 annotated on two proteins. The software of TCSS only provides the results of MAX strategy.  
 5 simUI and simGIC consider the sets of GO terms for two proteins and uses the Jaccard index to  
 6 calculate the similarity between them, thus MAX and BMA strategies are not relevant for them.

7 Most of node-based methods are based on information content (IC) that estimates the  
 8 property of a term  $c$ , and measures how specific and informative the term is. IC is commonly  
 9 defined as the negative log likelihood of the term,

$$10 \quad IC(c) = -\log p(c) \quad (5)$$

11 where  $p(c)$  is the probability of occurrence of the term  $c$  in a specific corpus (such as the GO  
 12 annotations of yeast genome or UniProt Knowledgebase), and is normally measured by the  
 13 frequency of annotations on  $c$  and all the descendants in the sub-DAG rooted from  $c$ . The more  
 14 often the term is used for annotation, the lower its semantic value.

15 Resnik [3] defined a semantic similarity between two terms  $c_1$  and  $c_2$  as simply the IC of their  
 16 most informative common ancestor (MICA),

$$17 \quad sim_{Resnik}(c_1, c_2) = IC(MICA). \quad (6)$$

18 Jiang and Conrath [4] proposed a hybrid semantic similarity measure that inherits from the  
 19 edge-based method and weights each edge by several factors, such as difference in IC, local  
 20 density, node depth, and link type. The edge weight ( $wt$ ) for a child node  $c$  and its parent node  $p$  is  
 21 in Formula 7,

$$22 \quad wt(cp) = (\beta + (1 - \beta) \frac{\bar{E}}{E(p)}) (\frac{d(p)+1}{d(p)})^\alpha [IC(c) - IC(p)] T(c, p) \quad (7)$$

23 where  $d(p)$  denotes the depth of the node  $p$  (usually calculated as the longest path length from the  
 24 root of the DAG to  $p$ ),  $E(p)$  the number of edges in the child links (i.e. local density),  $\bar{E}$  the  
 25 average density in the whole DAG, and  $T(c, p)$  the link relation/type factor. Two weighting factors,  
 26  $\alpha$  ( $\alpha \geq 0$ ) and  $\beta$  ( $0 \leq \beta \leq 1$ ) control the degree of how much the node depth and local  
 27 density contribute to the edge weighting computation. Note that these contributions become less  
 28 significant when  $\alpha$  approaches 0 and  $\beta$  approaches 1.

29 Then the overall distance between a node  $c$  and one of its ancestor ( $ance$ ) is defined as the  
 30 summation of edge weights along the shortest path linking them ( $path(c, ance)$ ),

$$31 \quad d(c, ance) = \sum_{c_i \in path(c, ance)} wt(c_i, parent(c_i)). \quad (8)$$

32 Now the semantic similarity between any two nodes ( $c_1$  and  $c_2$ ) relative to their MICA is defined  
 33 as,

$$34 \quad d(c_1, c_2) = dist(c_1, MICA) + dist(c_2, MICA). \quad (9)$$

35 In the special case, where only IC is considered while factors related to node depth, local  
 36 density and link type are ignored, i.e.,  $\alpha = 0$ ,  $\beta = 1$  and  $T(c, a) = 1$ , the distance between the two  
 37 nodes can be simplified as,

$$38 \quad d_{Jiang}(c_1, c_2) = IC(c_1) + IC(c_2) - 2IC(MICA). \quad (10)$$

1 The simplified semantic distance could be converted to a similarity using the formula in [9]

$$2 \quad \text{sim}_{Jiang}(c_1, c_2) = 1 - \min(1, d_{Jiang}(c_1, c_2)). \quad (11)$$

3 Jiang and Conrath showed that their measure is not very sensitive to changes in the values of  $\alpha$   
4 and  $\beta$ . Hence the node depth and local density are not the major determinants of the overall edge  
5 weight [4].

6 Lin [5] considered the distance of the terms from their common ancestor in a different way,

$$7 \quad \text{sim}_{Lin}(c_1, c_2) = \frac{2IC(MICA)}{IC(c_1) + IC(c_2)}. \quad (12)$$

8 Resnik, Jiang and Lin are the most commonly used IC-based semantic similarity measures.  
9 But they do not consider the unequal depth of biological knowledge representation in different  
10 braches of the GO graph. To overcome this, Jain and Bader [6] designed an improved IC-based  
11 algorithm, Topological Clustering Semantic Similarity (TCSS) by clustering similar GO terms into  
12 sub-graphs. A meta-graph was firstly created by partitioning the GO DAG into non-overlapping  
13 sub-graphs. Then, a semantic similarity between two GO terms  $s_i$  and  $t_j$  was calculated based on  
14 the annotation information content (ICA) of their MICA. If  $s_i$  and  $t_j$  belong to the same sub-graph,  
15 then their MICA will be in that sub-graph. The TCSS value of  $s_i$  and  $t_j$  is defined as

$$16 \quad TCSS(s_i, t_j) = ICS_{\max}(MICA). \quad (13)$$

17 ICS (sub-graph information content) is a normalized value like

$$18 \quad ICS(t_i^s) = \frac{ICA(t_i^s)}{\max_{t_i^s \in G_i^s} ICA(t_i^s)} \quad (14)$$

19 where the term  $t_i^s$  belongs to the  $i^{th}$  sub-graph  $G_i^s$ . If  $s_i$  and  $t_j$  belong to the different  
20 sub-graphs, then their MICA will be belong to the meta-graph,

$$21 \quad TCSS(s_i, t_j) = ICM_{\max}(MICA). \quad (15)$$

22 ICM (meta-graph information content) of a term  $t_i^m$  in meta-graph  $G^m$  is calculated within the  
23 meta-graph,

$$24 \quad ICM(t_i^m) = \frac{ICA(t_i^m)}{\max_{t_i^m \in G^m} ICA(t_i^m)}. \quad (16)$$

25 Let  $P$  and  $Q$  be two gene products of interest, and  $TP$  and  $TQ$  the sets of all the GO terms  
26 assigned to protein  $P$  and  $Q$ , respectively. Two pairwise approaches, namely MAX and BMA were  
27 implemented to quantify the relationship strength between  $P$  and  $Q$ . The MAX approach calculates  
28 the maximum semantic similarity score among all pairs of GO terms between  $TP$  and  $TQ$ ,

$$29 \quad \text{sim}_{MAX}^{GO}(P, Q) = \max_{\substack{tp_i \in TP \\ tq_j \in TQ}} \{ \text{sim}(tp_i, tq_j) \}. \quad (17)$$

30 The BMA approach computes the average of all maximum similarities for each term in  $TP$  and  
31  $TQ$ ,



1 linear correlations between semantic similarity and expression similarity. We also computed the  
2 Spearman's rank correlation rho and obtained similar correlations (data not shown).

#### 4 **References**

- 5 1. Wu X, Zhu L, Guo J, Zhang DY, Lin K (2006) Prediction of yeast protein-protein interaction  
6 network: insights from the Gene Ontology and annotations. *Nucleic Acids Res* 34: 2137-2150.
- 7 2. Wu H, Su Z, Mao F, Olman V, Xu Y (2005) Prediction of functional modules based on comparative  
8 genome analysis and Gene Ontology application. *Nucleic Acids Res* 33: 2822-2837.
- 9 3. Resnik P (1995) Using Information Content to Evaluate Semantic Similarity in a Taxonomy.  
10 IJCAI'95: Proceedings of the 14th International Joint Conference on Artificial Intelligence San  
11 Francisco, CA, USA.
- 12 4. Jiang JJ, Conrath DW (1997) Semantic Similarity Based on Corpus Statistics and Lexical Taxonomy.  
13 Proceedings of International Conference Research on Computational Linguistics (ROCLING  
14 X): 9008.
- 15 5. Lin D (1998) An Information-Theoretic Definition of Similarity. Proceedings of the Fifteenth  
16 International Conference on Machine Learning: Morgan Kaufmann Publishers Inc. pp.  
17 296-304.
- 18 6. Jain S, Bader GD (2010) An improved method for scoring protein-protein interactions using  
19 semantic similarity within the Gene Ontology. *BMC Bioinformatics* 11: 562.
- 20 7. Gentleman R (2005) Visualizing and Distances Using GO. URL  
21 <http://www.bioconductor.org/docs/vignettes/html>.
- 22 8. Pesquita C, Faria D, Bastos H, Falcao AO, Couto FM (2007) Evaluating GO-based Semantic  
23 Similarity Measures. In: ISMB/ECCB 2007 SIG Meeting Program Materials International  
24 Society for Computational Biology.
- 25 9. Yu G, Li F, Qin Y, Bo X, Wu Y, et al. (2010) GOSemSim: an R package for measuring semantic  
26 similarity among GO terms and gene products. *Bioinformatics* 26: 976-978.
- 27 10. Su AI, Wiltshire T, Batalov S, Lapp H, Ching KA, et al. (2004) A gene atlas of the mouse and  
28 human protein-encoding transcriptomes. *Proc Natl Acad Sci U S A* 101: 6062-6067.
- 29 11. Nehrt NL, Clark WT, Radivojac P, Hahn MW (2011) Testing the ortholog conjecture with  
30 comparative functional genomic data from mammals. *PLoS Comput Biol* 7: e1002073.
- 31 12. Spellman PT, Sherlock G, Zhang MQ, Iyer VR, Anders K, et al. (1998) Comprehensive  
32 identification of cell cycle-regulated genes of the yeast *Saccharomyces cerevisiae* by  
33 microarray hybridization. *Mol Biol Cell* 9: 3273-3297.

34
